# Supplementary material
Source: PubMed Central journal article supplement (PMC5998934)
Supplement: ba016295-suppl1.pdf [file ba016295-suppl1.pdf]

## **SUPPLEMENTARY MATERIALS**

### **Supplementary Figures**

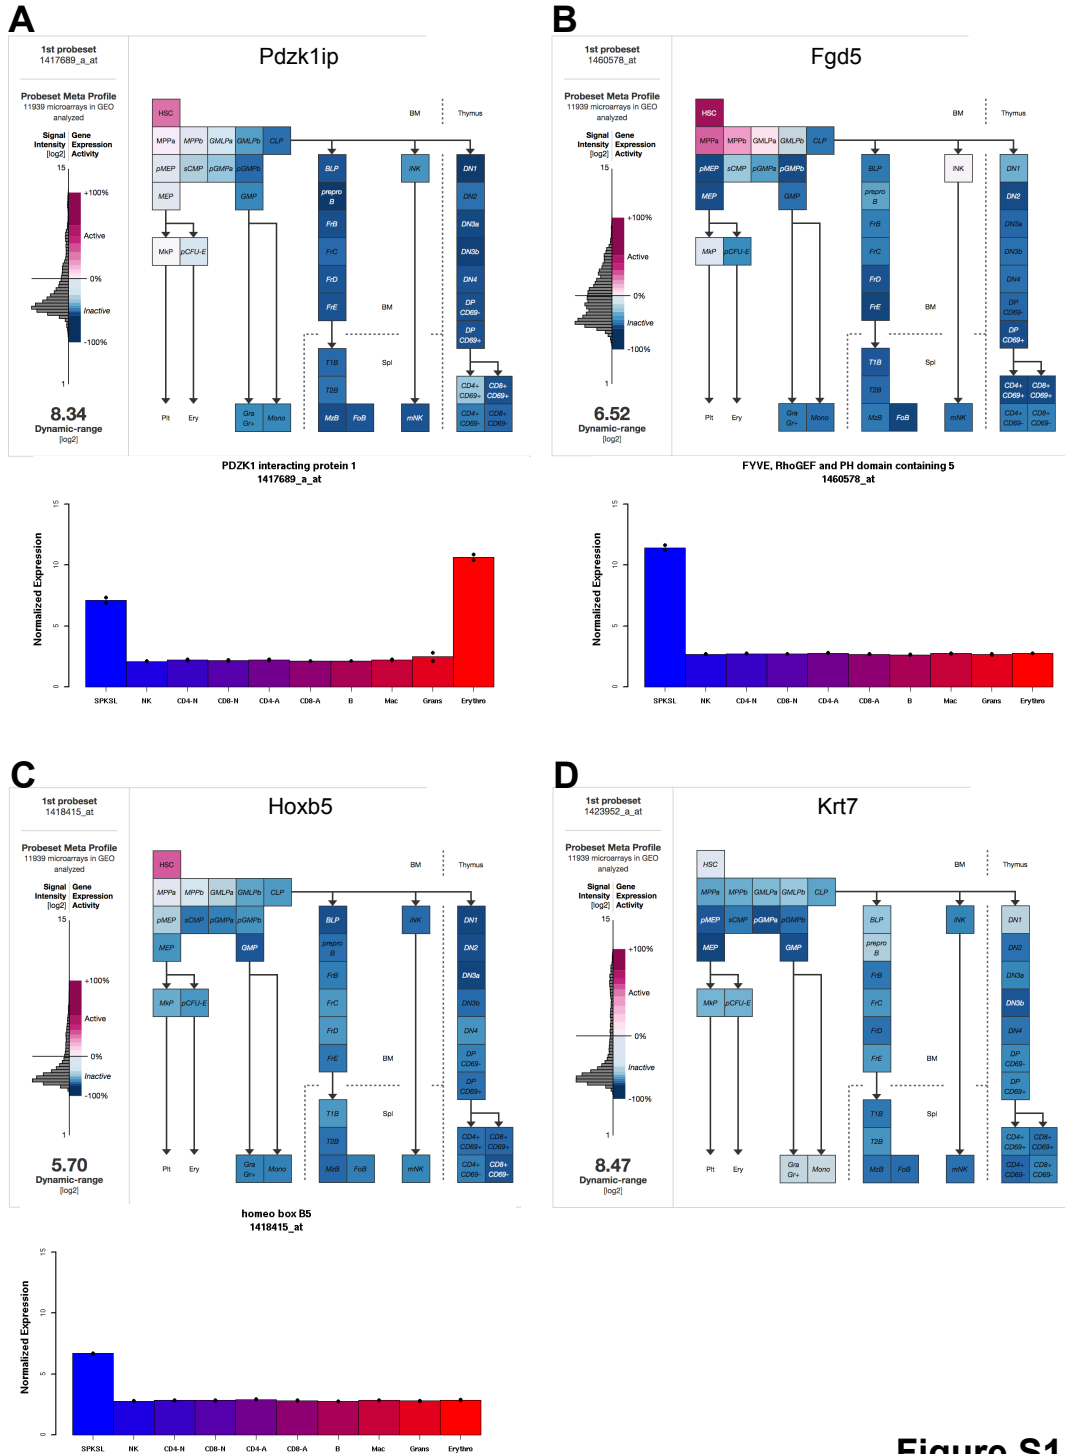

**Figure S1**

**Figure S1.** Expression patterns of reported HSC marker genes. (A) *Pdzk1ip*, (B) *Fgd5*, (C) *Hoxb5*, and (D) *Krt7*. Data was obtained from the Gene Expression Commons (top) and the Hematopoietic fingerprints. Hematopoietic fingerprint data for *Krt7* was not available.

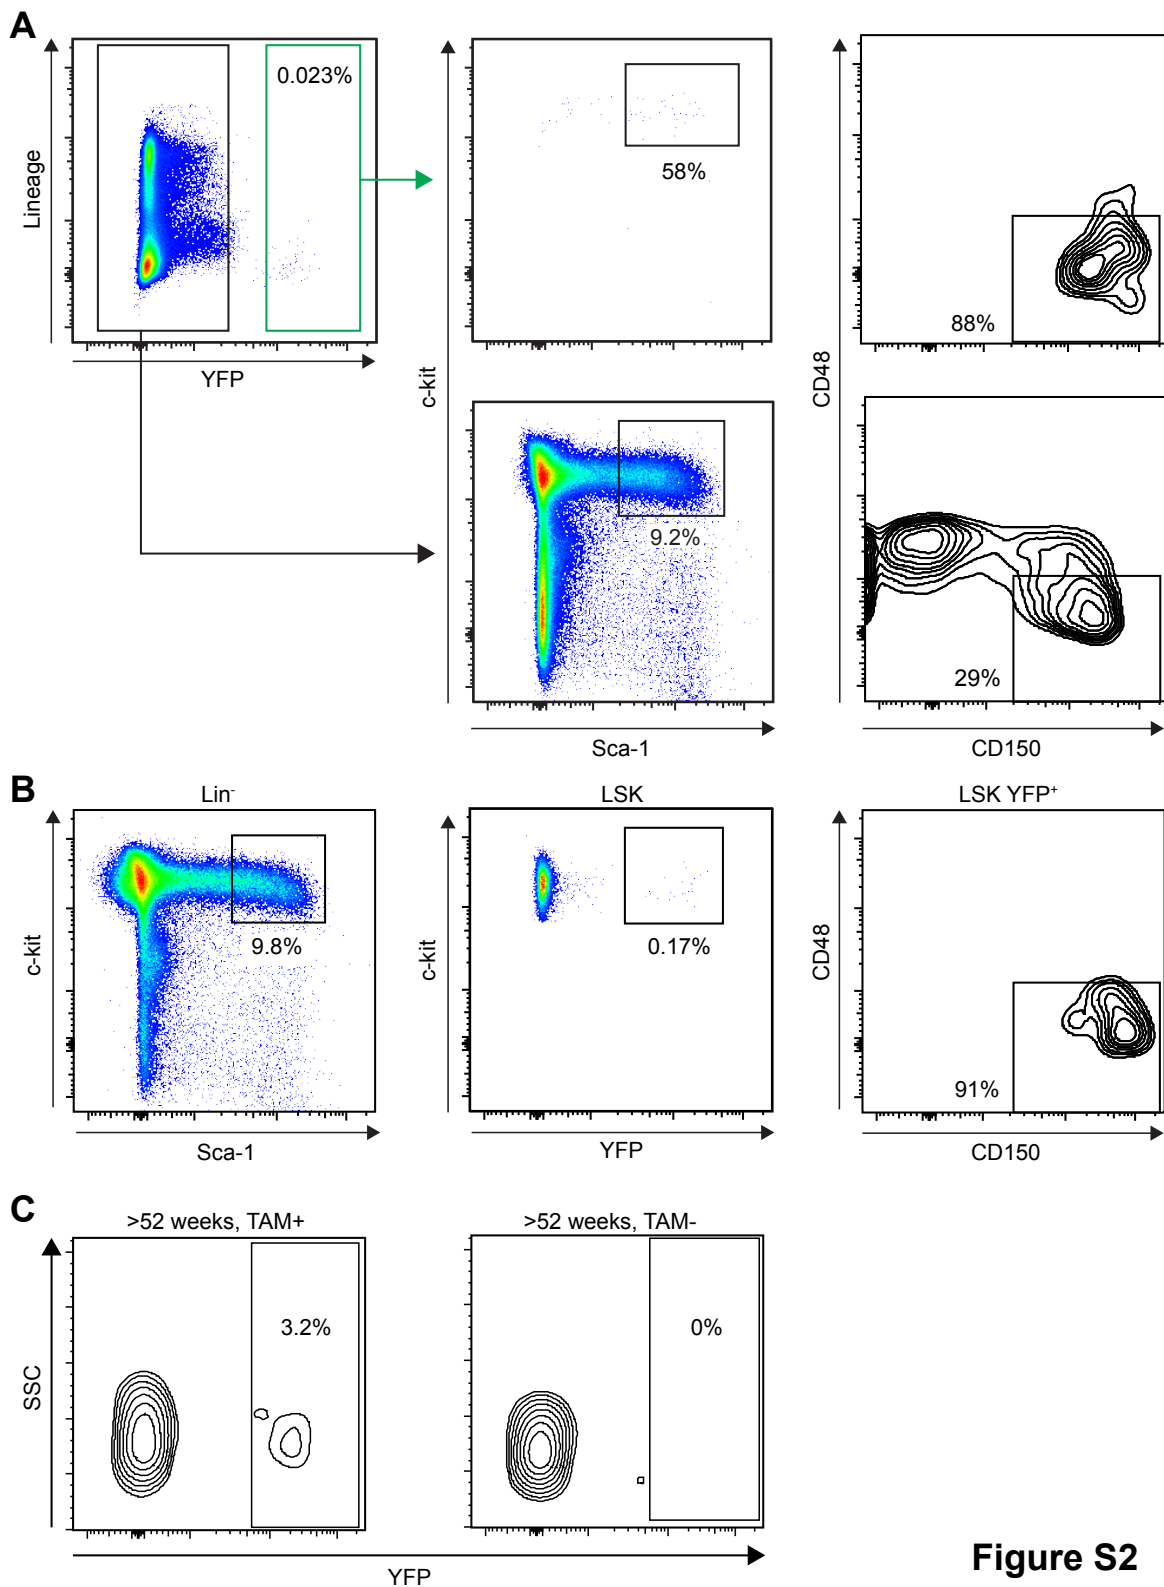

**Figure S2**

**Figure S2.** Additional gating schemes with the *Krt18-CreER/YFP* mice. **(A)** Live mononucleated cells were gated based on YFP expression, then based on c-kit and Sca-1 expression, then on

CD150 and CD48 expression. **(B)** c-kit<sup>+</sup>Sca-1<sup>+</sup> cells were gated within the lineage<sup>-</sup> cells, then gated based on YFP expression. Most LSK YFP<sup>+</sup> cells were CD150<sup>+</sup>CD48<sup>-</sup>. **(C)** Labeling efficiency of HSCs in *Krt18-CreER/YFP* mice without tamoxifen treatment. Mice more than 52 weeks of age without tamoxifen had no YFP labeling in HSCs.

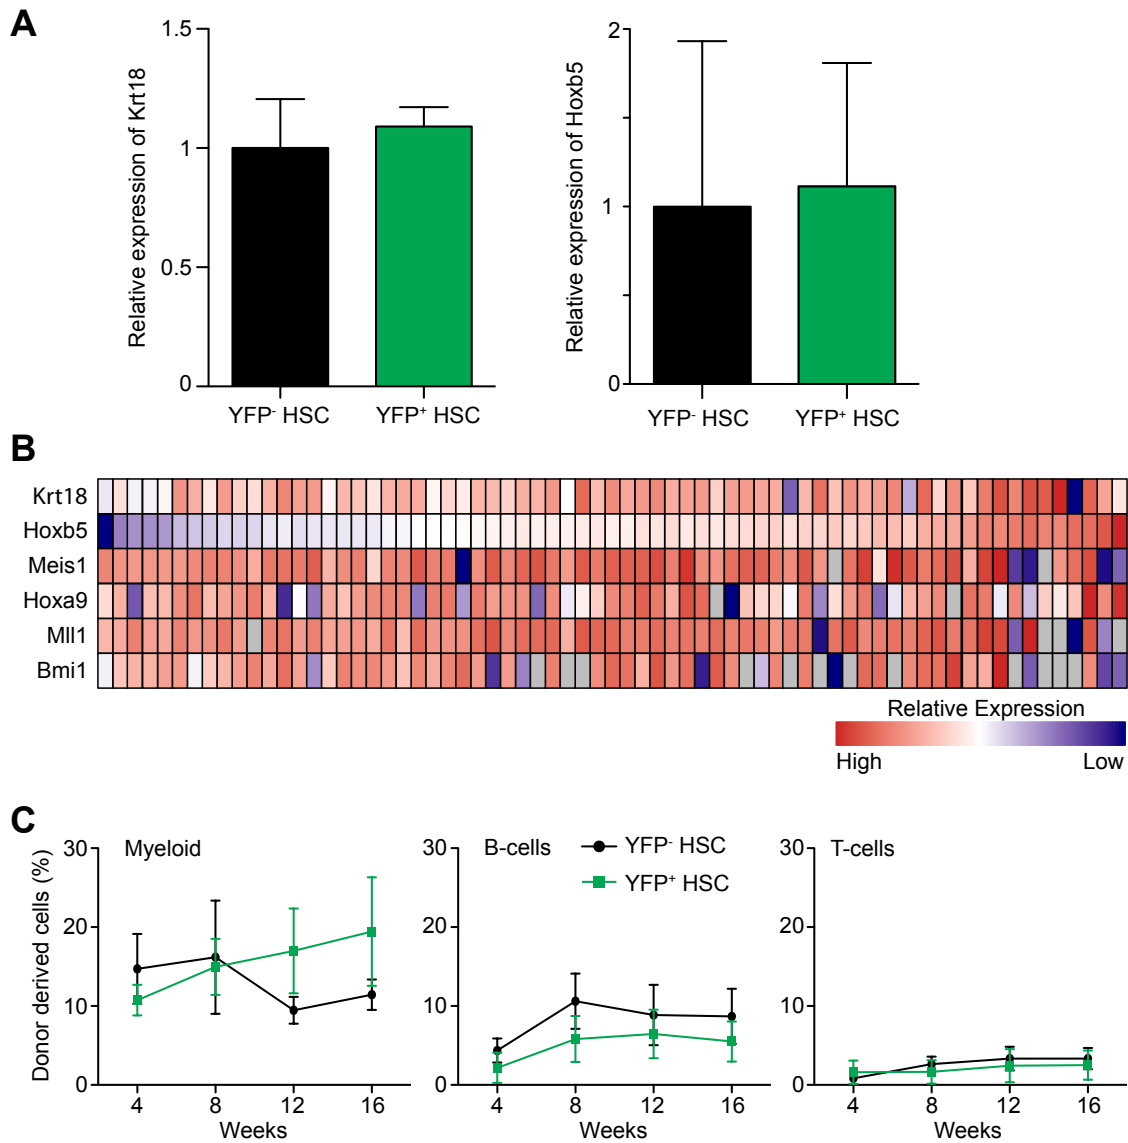

**Figure S3**

**Figure S3.** *Krt18* expression in HSCs. **(A)** Expression levels of *Krt18* (left) and *Hoxb5* (right) in both YFP<sup>-</sup> and YFP<sup>+</sup> HSCs in *Krt18-CreER/YFP* mice 1 week after tamoxifen treatment (n=3). *Krt18* and *Hoxb5* were expressed at similar levels in both fractions of HSCs. **(B)** Single cell qPCR analysis on HSCs. Most single sorted HSCs expressed known HSC marker genes such as *Hoxb5*, *Meis1*, *Hoxa9*, *Mll1*, and *Bmi1*. *Krt18* was expressed in most single sorted HSCs. Cells were sorted based on the expression levels of *Hoxb5*. **(C)** Donor type reconstitution in

myeloid cells (left), B-cells (middle), and T-cells (right) after transplanting 30 YFP<sup>-</sup> or YFP<sup>+</sup> HSCs from *Krt18-CreER/YFP* mice. Data in (**A** and **C**) represents mean±SEM.

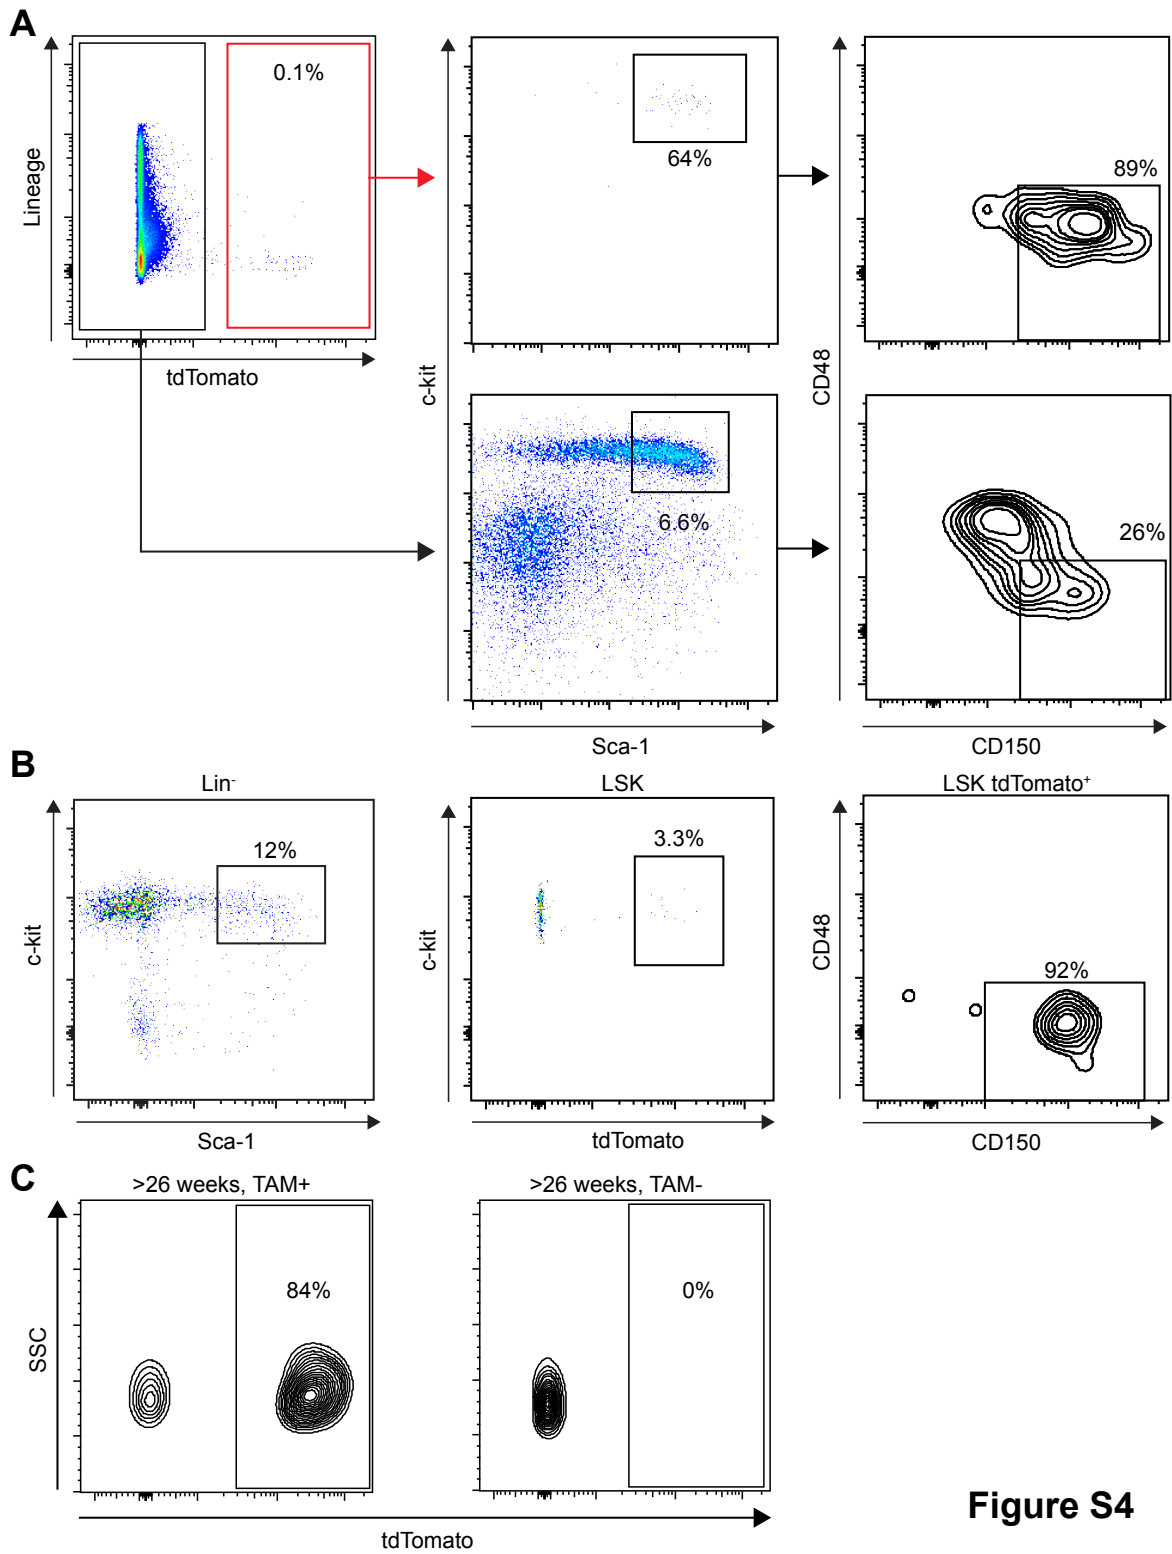

**Figure S4**

**Figure S4.** Additional gating schemes with the *Fgd5-CreER/tdTomato* mice. (A) Live mononucleated cells were gated based on tdTomato expression, then based on c-kit and Sca-1 expression, then on CD150 and CD48 expression. (B) c-kit<sup>+</sup>Sca-1<sup>+</sup> cells were gated within the

lineage<sup>-</sup> cells, then gated based on tdTomato expression. Most LSK tdTomato<sup>+</sup> cells were CD150<sup>+</sup>CD48<sup>-</sup>. (C) Labeling efficiency of HSCs in *Fgd5-CreER/tdTomato* mice without tamoxifen treatment. Mice more than 26 weeks of age without tamoxifen had no tdTomato labeling in HSCs.

**Supplementary Table 1 (List of primers used in the study)**

| <b>Name</b> | <b>Sequence (5'-3')</b>   |
|-------------|---------------------------|
| Actb F      | CGTCGACAACGGCTCCGGCATG    |
| Actb R      | GGGCCTCGTCACCCACATAGGAG   |
| Krt18 F     | ATTTTCAGTCTCAACGATGCCCT   |
| Krt18 R     | TGCCATCCACGATCTTACGG      |
| Hoxb5 F     | GCAGACTCCACAGATATTCC      |
| Hoxb5 R     | CAGGTAGCGATTGAAGTGG       |
| Meis1 F     | ATGGGTTCCCTCGGTCAATG      |
| Meis1 R     | CATTTCTCAAAAATCAGTGCTAAGA |
| Hoxa9 F     | AAACAATGCCGAGAATGAGAG     |
| Hoxa9 R     | AAACAGAAACTCCTTCTCCAG     |
| Mll1 F      | TGAACATCCTCAACCCACTC      |
| Mll1 R      | GTCTTCCTTAAAGTCCACTCTG    |
| Bmi1 F      | CCGGGATCTTTTATCAAGCA      |
| Bmi1 R      | TTGCTGGTCTCCAAGTAACGT     |
